# Supplementary material for: A Novel Strain of Bacillus cereus with a Strong Antagonistic Effect Specific to Sclerotinia and Its Genomic and Transcriptomic Analysis
Source: MDPI journal article supplement (doi:10.3390/microorganisms12030611), 2024-03-19
Supplement: s1 [file s1]

# A Novel Strain of *Bacillus cereus* with a Strong Antagonistic Effect Specific to *Sclerotinia* and Its Genomic and Transcriptomic Analysis

Wanfu Ma <sup>1,2,†</sup>, Jinhao Ding <sup>2,3,†</sup>, Qingyun Jia <sup>2,3</sup>, Qianru Li <sup>2,3</sup>, Shanhai Jiao <sup>4</sup>, Xupeng Guo <sup>2</sup>, Chengming Fan <sup>2,\*</sup>, Yuhong Chen <sup>2,\*</sup> and Zanmin Hu <sup>2,3</sup>

<sup>1</sup> College of Tropical Agriculture and Forestry, Hainan University, Haikou 570228, China; mawanfu1234@163.com

<sup>2</sup> Key Laboratory of Seed Innovation, Institute of Genetics and Developmental Biology, Innovation Academy for Seed Design, Chinese Academy of Sciences, Beijing 100101, China; jhding@genetics.ac.cn (J.D.); qyjia@genetics.ac.cn (Q.J.); qrli@genetics.ac.cn (Q.L.); guoxvpeng@163.com (X.G.); zmhu@genetics.ac.cn (Z.H.)

<sup>3</sup> College of Advanced Agricultural Sciences, University of Chinese Academy of Sciences, Beijing 100049, China

<sup>4</sup> AUSCA Oils and Grains Industries Co., Ltd., Fangchenggang 538000, China; jsh123456@126.com

\* Correspondence: cmfan@genetics.ac.cn (C.F.); yhchen@genetics.ac.cn (Y.C.); Tel./Fax: +86-010-64807626

† These authors contributed equally to this work.

**Table S1:** Identification of the physiological and biochemical properties of HF10.

| Physiological and biochemical tests | results | Physiological and biochemical tests | results |
|-------------------------------------|---------|-------------------------------------|---------|
| Glucose fermentation test           | +       | Catalase test                       | +       |
| Maltose fermentation test           | +       | Gelatine                            | +       |
| Sucrose fermentation test           | +       | liquefaction test                   | +       |
| Mannitol fermentation test          | -       | Nitrate reduction test              | +       |
| Sorbitol fermentation test          | -       | Anaerobic test                      | +       |
| Lactose fermentation test           | -       | 7% NaCl (sodium chloride) test      | +       |
| Galactose fermentation test         | -       | Voges-Proskauer test                | +       |
| Sodium propionate test              | -       | Oxidase test                        | +       |
|                                     |         | Starch hydrolysis test              | +       |

Note: "+" represents a positive reaction, and "-" represents a negative reaction.

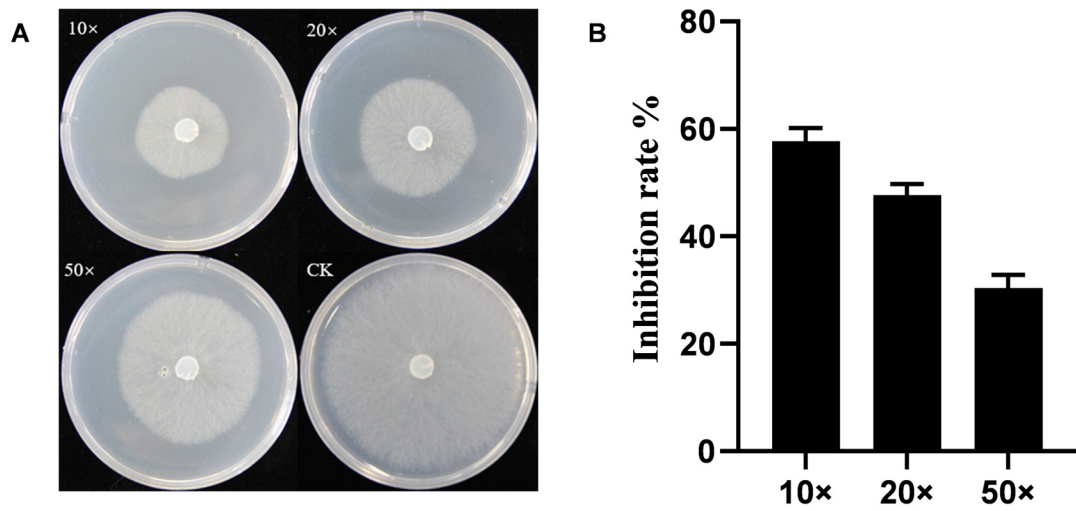

**Figure S1:** Inhibitory effect of sterile supernatant from fermentation with HF10 on *Sclerotinia sclerotiorum*. Inhibitory effect of sterile supernatant from fermentation with HF10 broth diluted to 10 $\times$ , 20 $\times$ , and 50 $\times$  on *Sclerotinia sclerotiorum*. As the dilution time increased, the inhibitory effect decreased (A), with inhibition rates of 58%, 47%, and 30% at 10 $\times$ , 20 $\times$ , and 50 $\times$ , respectively (B).

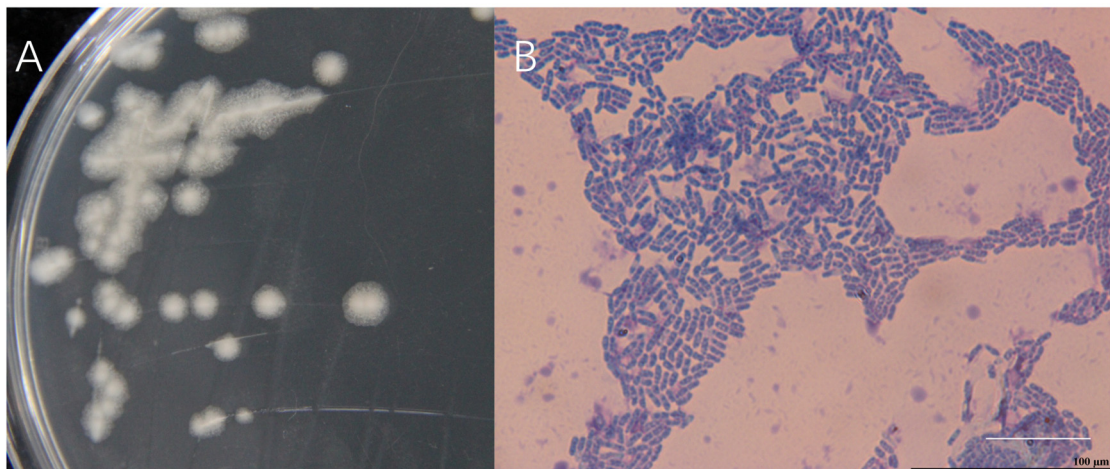

**Figure S2:** Colony and cell morphology of *B. cereus* HF10. A, Colony of strain HF10; white, flat, and wet opaque surface; suborbicular shape. B, Cells stained with 0.1% crystal violet stain solution, indicating a rod-shaped structure. Bar = 50  $\mu$ m.

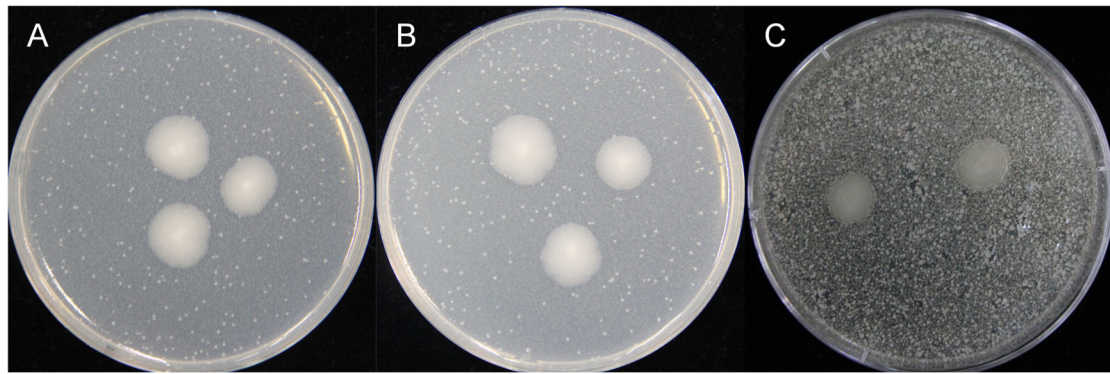

**Supplementary Figure S3:** HF10 had no inhibitory effect on bacteria. We tested its antibacterial activity against *Escherichia coli* (A), *Staphylococcus aureus* (B), and *Agrobacterium tumefaciens* (C) and found that it had no inhibitory effect on these bacteria.

>16S rDNA sequencing results of HF10

```

AGGGGCCCCGTGGCCGGGCTGCTATACATGCAGTCGAGCGAATG
GATTAAGAGCTTGCTCTTATGAAGTTAGCGGCGGACGGGTGAGT
AACACGTGGGTAACCTGCCCATAGACTGGGATAACTCCGGGA
AACCGGGGCTAATACCGGATAACATTTTGAACCGCATGGTTCGA
AATTGAAAGGCGGCTTCGGCTGTCACTTATGGATGGACCCGCGT
CGCATTAGCTAGTTGGTGAGGTAACGGCTCACCAAGGCAACGA
TGCGTAGCCGACCTGAGAGGGTGATCGGCCACACTGGGACTGA
GACACGGCCCAGACTCCTACGGGAGGCAGCAGTAGGGAATCTT
CCGCAATGGACGAAAGTCTGACGGAGCAACGCCGCGTGAGTG
ATGAAGGCTTTCGGGTCGTAAACTCTGTTGTTAGGGAAGAAC
AAGTGCTAGTTGAATAAGCTGGCACCTTGACGGTACCTAACCA
GAAAGCCACGGCTAACTACGTGCCAGCAGCCGCGGTAATACGT
AGGTGGCAAGCGTTATCCGGAATTATTGGGCGTAAAGCGCGCG
CAGGTGGTTTCTTAAGTCTGATGTGAAAGCCCACGGCTCAACC

```

GTGGAGGGTCATTGGAACTGGGAGACTTGAGTGCAGAAGAG  
GAAAGTGGAATTCCATGTGTAGCGGTGAAATGCGTAGAGATATG  
GAGGAACACCAGTGGCGAAGGCGACTTTCTGGTCTGTAACTGA  
CACTGAGGCGCGAAAGCGTGGGGAGCAAACAGGATTAGATACC  
CTGGTAGTCCACGCCGTAAACGATGAGTGCTAAGTGTTAGAGG  
GTTTCCGCCCTTTAGTGCTGAAGTTAACGCATTAAGCACTCCGC  
CTGGGGAGTACGGCCGCAAGGCTGAAACTCAAAGGAATTGAC  
GGGGGCCCCGCACAAGCGGTGGAGCATGTGGTTTAATTCGAAGC  
AACGCGAAGAACCTTACCAGGTCTTGACATCCTCTGAAAACCC  
TAGAGATAGGGCTTCTCCTTCGGGAGCAGAGTGACAGGTGGTG  
CATGGTTGTCGTCAGCTCGTGTCGTGAGATGTTGGGTTAAGTCC  
CGCAACGAGCGCAACCCTTGATCTTAGTTGCCATCATTAAAGTTG  
GGCACTCTAAGGTGACTGCCGGTGACAAACCGGAGGAAGGTG  
GGGATGACGTCAAATCATCATGCCCCTTATGACCTGGGCTACAC  
ACGTGCTACAATGGACGGTACAAAGAGCTGCAAGACCGCGAG  
GTGGAGCTAATCTCATAAAACCGTTCTCAGTTCGGATTGTAGGC  
TGCAACTCGCCTACATGAAGCTGGAATCGCTAGTAATCGCGGAT  
CAGCATGCCGCGGTGAATACGTTCCCGGGCCTTGTACACACCGC  
CCGTCACACCACGAGAGTTTGTAACACCCGAAGTCGGTGGGGT  
AACCTTTTTTGGAGCCAGCCGCCTAAGTGAACAGAGG
